# Supplementary material
Source: publisher figshare collection journal article supplement (https://acs.figshare.com/ndownloader/files/25912102)
Supplement: Supplementary file 1 [file 25912102]

# Supporting information

## **Effect of Zn in Ag-Loaded Zn-Modified ZnTa<sub>2</sub>O<sub>6</sub> for Photocatalytic Conversion of CO<sub>2</sub> by H<sub>2</sub>O**

Shuying Wang<sup>†</sup>, Kentaro Teramura<sup>†,‡\*</sup>, Hiroyuki Asakura<sup>†,‡</sup>, Saburo Hosokawa<sup>†,‡</sup>,  
Tsunehiro Tanaka<sup>†,‡\*</sup>

<sup>†</sup>Department of Molecular Engineering, Graduate School of Engineering, Kyoto University,  
Kyotodaigaku Katsura, Nishikyo-ku, Kyoto 615-8510, Japan

<sup>‡</sup>Element Strategy Initiative for Catalysts & Batteries (ESICB), Kyoto University, 1-30  
Goryo-Ohara, Nishikyo-ku, Kyoto 615-8245, Japan

E-mail address: teramura@moleng.kyoto-u.ac.jp; tanakat@moleng.kyoto-u.ac.jp

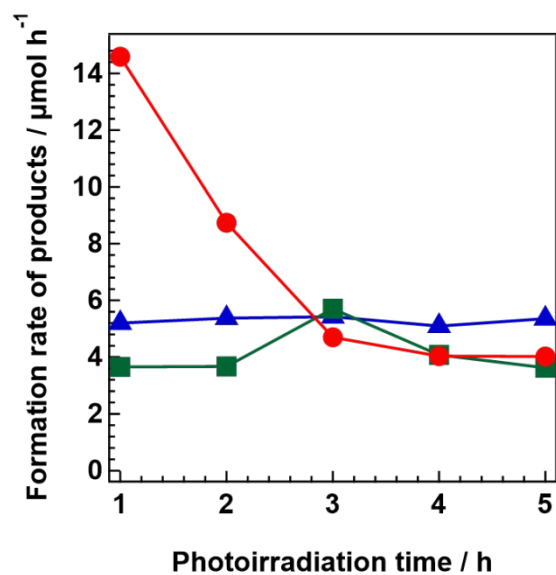

Figure S1. Time-dependent evolution of  $\text{H}_2$  (blue),  $\text{O}_2$  (green), and  $\text{CO}$  (red) 3.0Ag/  
 $\text{Zn}_3\text{Ta}_2\text{O}_8$

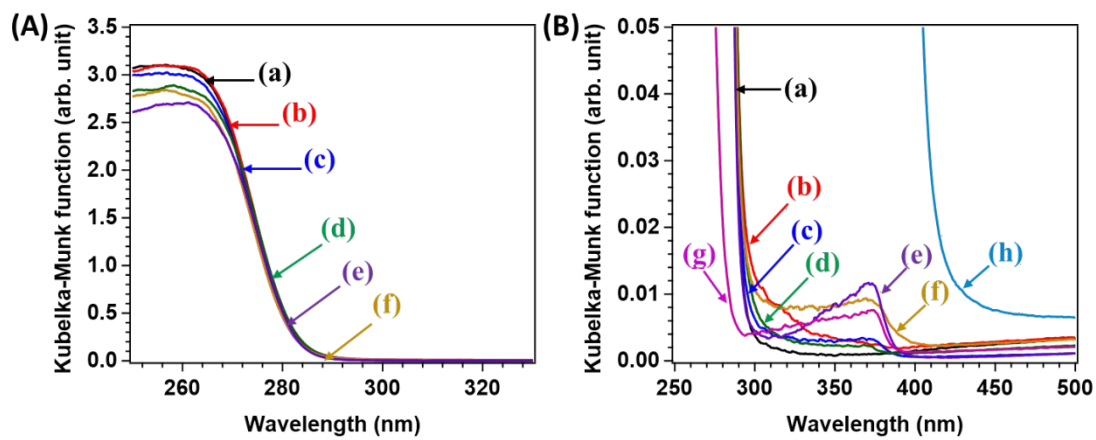

Figure S2 UV-vis spectra of (a) ZnTa<sub>2</sub>O<sub>6</sub>, (b) 2.5Zn/ZnTa<sub>2</sub>O<sub>6</sub>, (c) 10Zn/ZnTa<sub>2</sub>O<sub>6</sub>, (d) 15Zn/ZnTa<sub>2</sub>O<sub>6</sub>, (e) 20Zn/ZnTa<sub>2</sub>O<sub>6</sub>, (f) 40Zn/ZnTa<sub>2</sub>O<sub>6</sub>, (g) Zn<sub>3</sub>Ta<sub>2</sub>O<sub>8</sub>, (h) ZnO

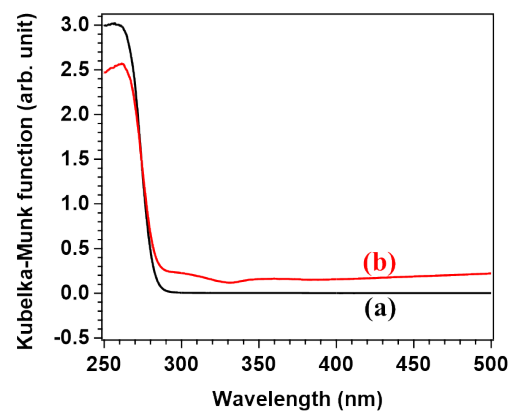

Figure S3 UV-vis spectra of (a) 10Zn/ZnTa<sub>2</sub>O<sub>6</sub>; (b) Ag/10Zn/ZnTa<sub>2</sub>O<sub>6</sub>

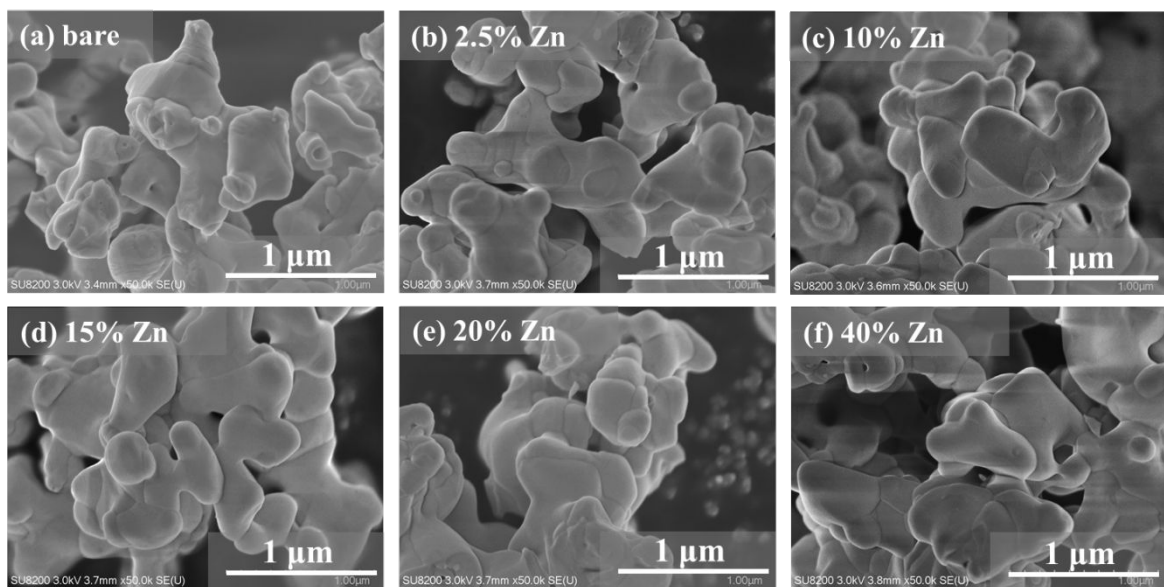

Figure S4 SEM images of the (a)  $\text{ZnTa}_2\text{O}_6$ , (b)  $2.5\text{Zn}/\text{ZnTa}_2\text{O}_6$ , (c)  $10\text{Zn}/\text{ZnTa}_2\text{O}_6$ , (d)  $15\text{Zn}/\text{ZnTa}_2\text{O}_6$ , (e)  $20\text{Zn}/\text{ZnTa}_2\text{O}_6$ , (f)  $40\text{Zn}/\text{ZnTa}_2\text{O}_6$ ,

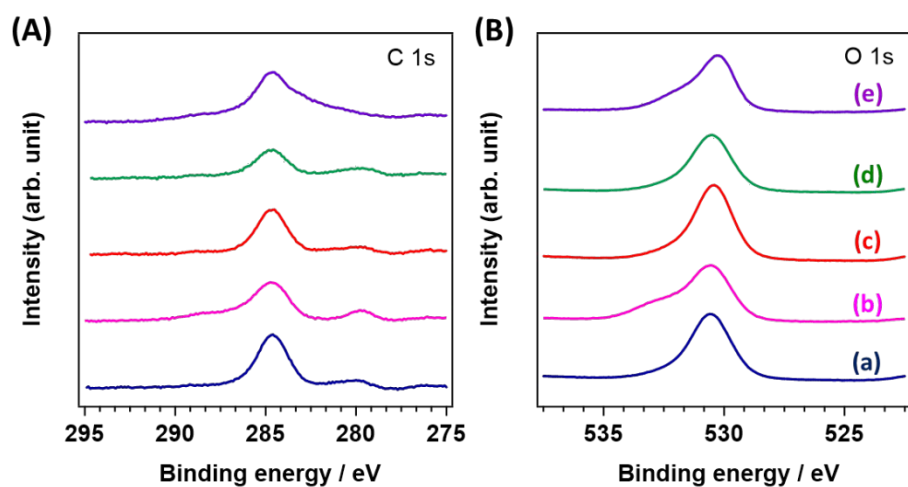

Figure S5. XPS spectra of (A) C 1s and (B) O 1s for (a)  $\text{ZnTa}_2\text{O}_6$ , (b)  $10\text{Zn}/\text{ZnTa}_2\text{O}_6$  without calcination; (c)  $10\text{Zn}/\text{ZnTa}_2\text{O}_6$ , (d)  $\text{Zn}_3\text{Ta}_2\text{O}_8$ , and (e)  $\text{ZnO}$

Table S1. The ratio of Zn to Ta detected by EDS and XPS

|                                                | Zn/Ta in<br>theory | Zn/Ta by<br>EDS | Zn/Ta by XPS | BET / m <sup>2</sup> g <sup>-1</sup> |
|------------------------------------------------|--------------------|-----------------|--------------|--------------------------------------|
| ZnTa <sub>2</sub> O <sub>6</sub>               | 0.50               | 0.50            | 0.63         | 2.5                                  |
| 10Zn/ZnTa <sub>2</sub> O <sub>6</sub>          | 0.55               | 0.57            | 1.24         | 2.2                                  |
| 3.0Ag/10Zn/ZnTa <sub>2</sub> O <sub>6</sub>    | 0.55               | 0.57            | 1.01         | /                                    |
| Zn <sub>3</sub> Ta <sub>2</sub> O <sub>8</sub> | 1.50               | 1.54            | 2.61         | /                                    |

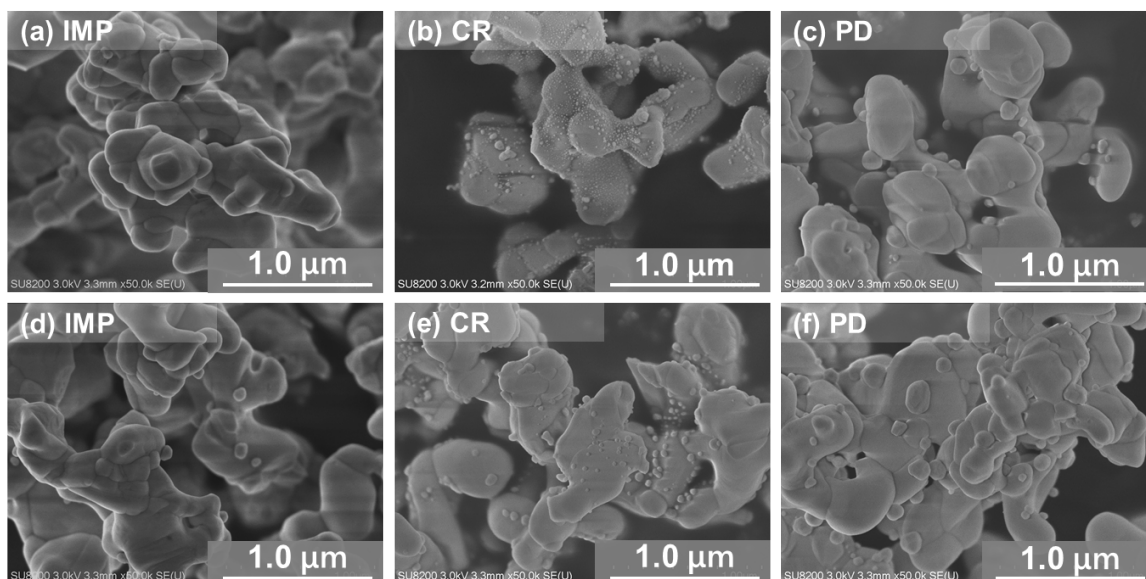

Figure S6. SEM images of (a), (d) 1.5Ag/10Zn/ZnTa<sub>2</sub>O<sub>6</sub> (IMP method); (b), (e) 1.5Ag/10Zn/ZnTa<sub>2</sub>O<sub>6</sub> (CR method); and (c), (f) 1.5Ag/10Zn/ZnTa<sub>2</sub>O<sub>6</sub> (PD method). (a–c) before reaction, and (d–f) after reaction.



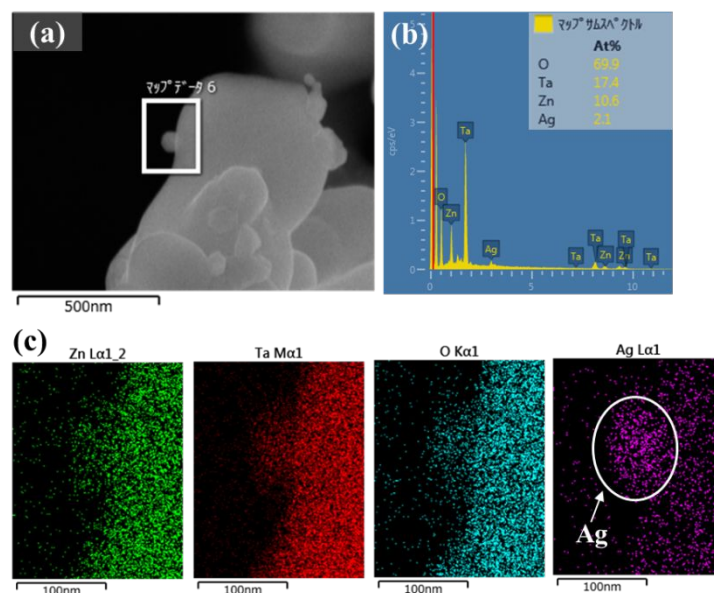

Figure S7. (a) 3.0Ag/10Zn/ZnTa<sub>2</sub>O<sub>6</sub>: Zn prepared by IMP method, after reaction; (b) EDS mapping of the Ag-loaded ZnTa<sub>2</sub>O<sub>6</sub>: Zn after photocatalytic reactions; (c) EDS mapping of the Zn, Ta, O, and Ag element

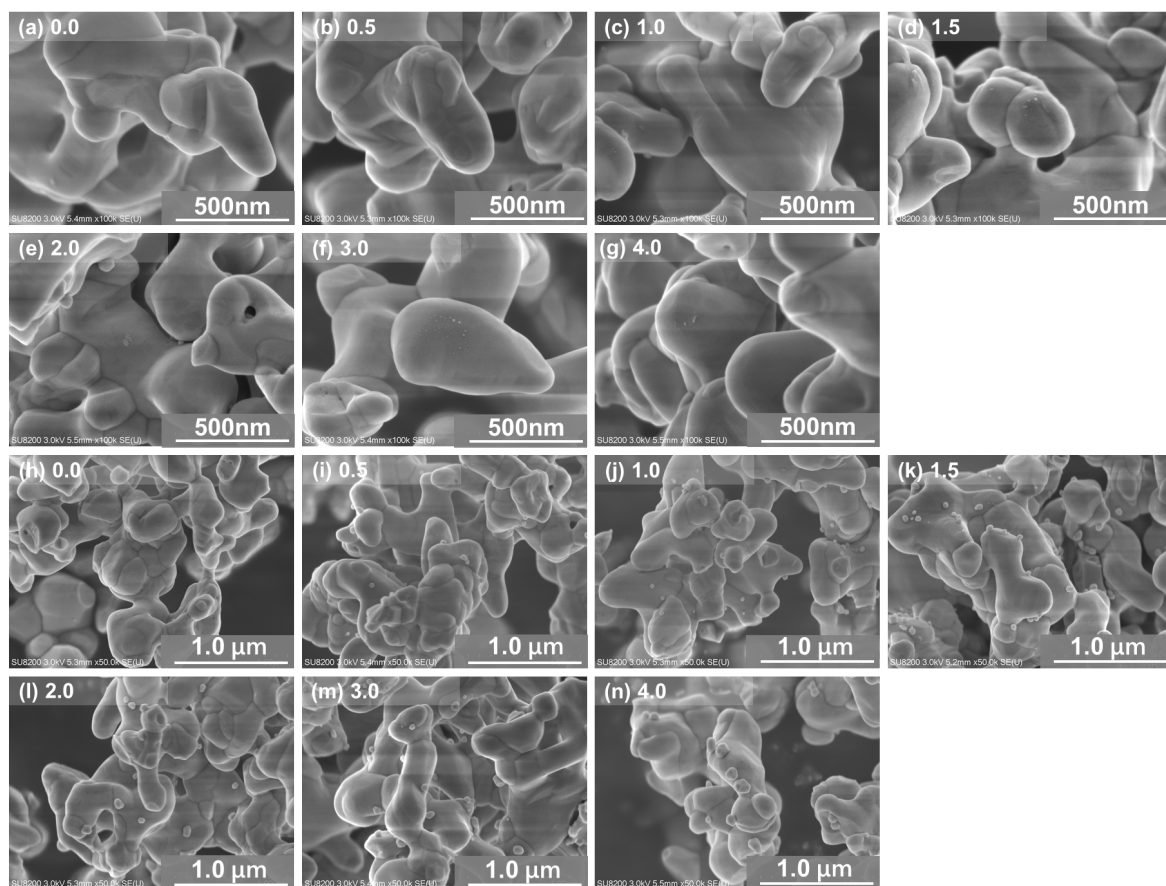

Figure S8. SEM image of the 10Zn/ZnTa<sub>2</sub>O<sub>6</sub> loaded with various amount of Ag cocatalyst (a-g) before reaction; (h-n) After 5-h photocatalytic reaction. (a) and (h) 0.0Ag; (b) and (i) 0.5Ag; (c) and (j) 1.0Ag; (d) and (k) 1.5Ag; (e) and (l) 2.0Ag; (f) and (m) 3.0Ag; (g) and (n) 4.0Ag.

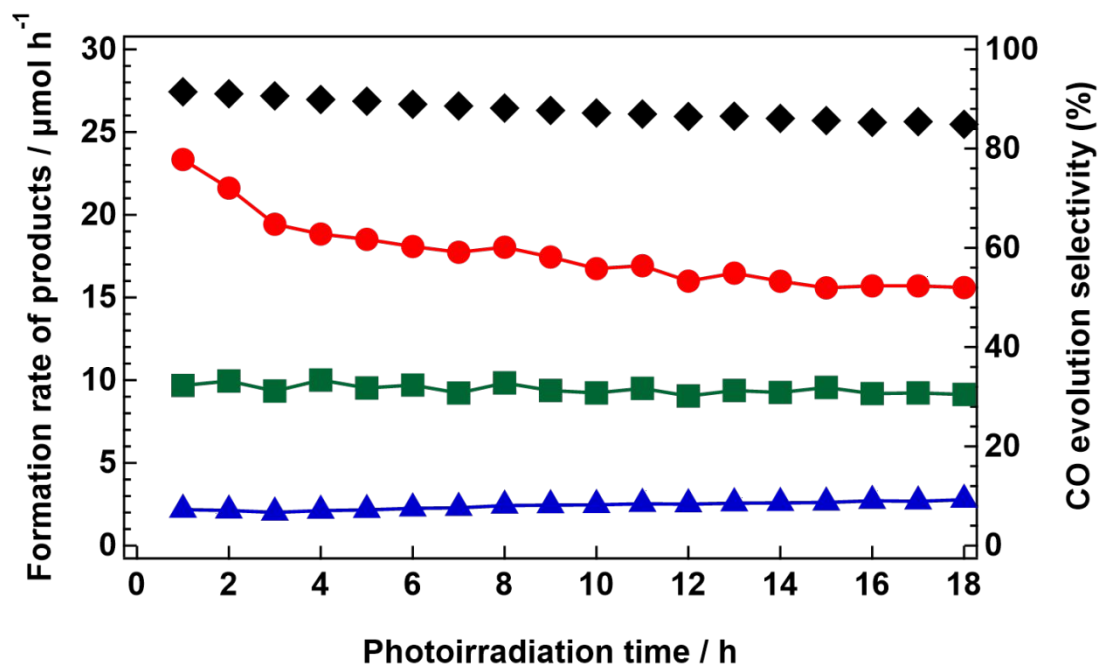

Figure S9. Time-dependent evolution of H<sub>2</sub> (blue), O<sub>2</sub> (green), and CO (red) over 3.0Ag/10Zn/ZnTa<sub>2</sub>O<sub>6</sub>

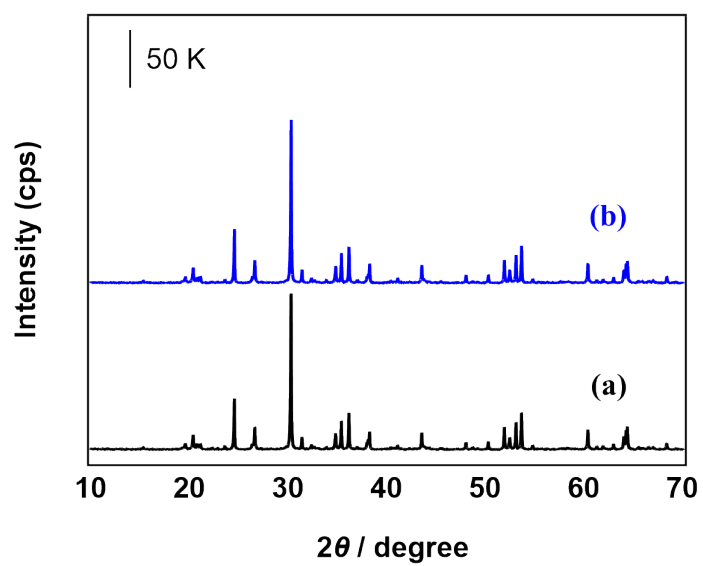

Figure S10. XRD patterns of  $3.0\text{Ag}/10\text{Zn}/\text{ZnTa}_2\text{O}_6$  (a) before and (b) after 15 h photocatalytic reaction.

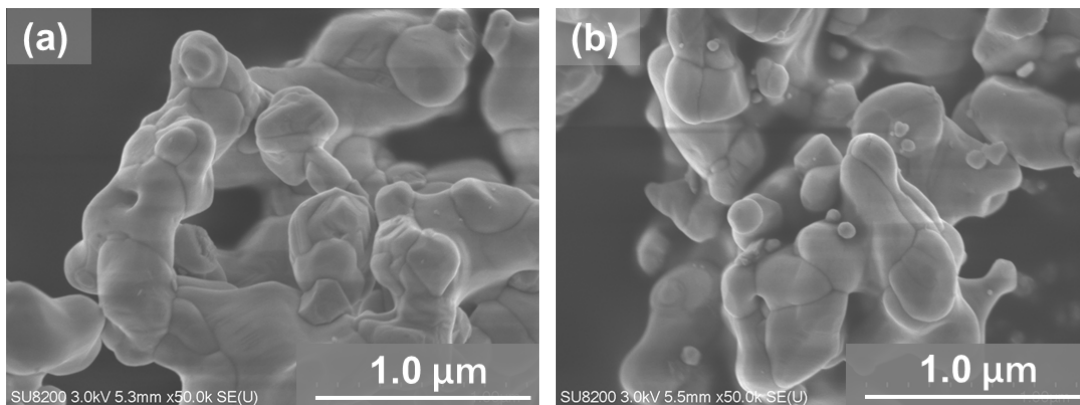

Figure S11. SEM images of 3.0Ag/10Zn/ZnTa<sub>2</sub>O<sub>6</sub> (a) before and (b) after 15 h photocatalytic reaction.

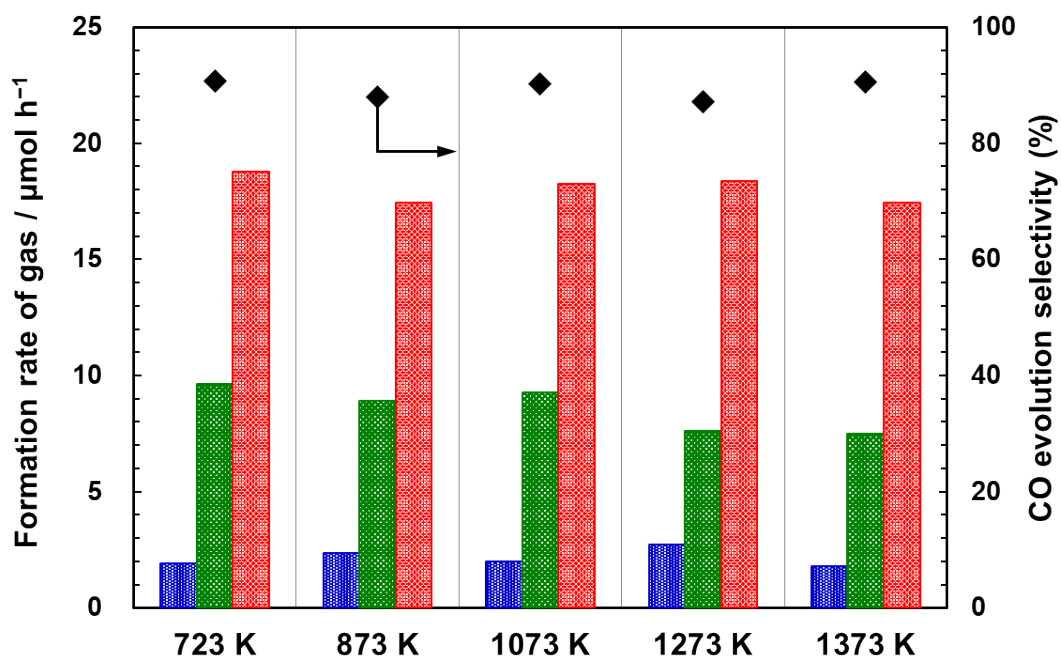

Figure S12 the formation rate of H<sub>2</sub> (blue), O<sub>2</sub> (green), and CO (red) over the Ag/Zn/ZnTa<sub>2</sub>O<sub>6</sub> fabricated at various kinds calcination temperature.

Scheme S1. The scheme of the inner irradiation reactor

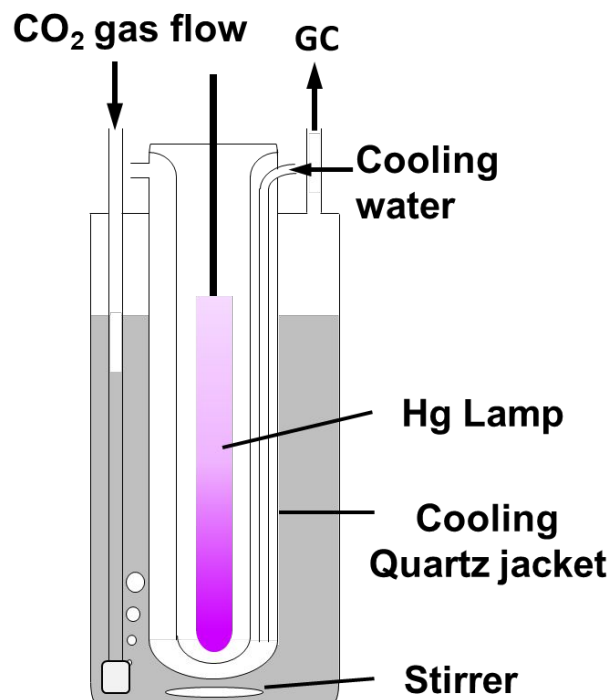

The formation rates of the products (CO, H<sub>2</sub> and O<sub>2</sub>) were calculated by the follow equation:

$$\text{Formation rate of products / mol h}^{-1} = S \cdot c^* / (1 \text{ mL}) \cdot (30 \text{ mL/min}) \cdot 60 \text{ min}$$

Where  $S$  represents the peak area of gas products detected by the TCD-GC, and FID-GC,  $c$  represents a factor of the relationship between the amount of the gas products and the peak area of gas products such as CO, H<sub>2</sub>, and O<sub>2</sub>. The factor  $c$  was obtained by flowing the Ar-diluted mixture gas which contained certain concentration of CO, H<sub>2</sub>, and O<sub>2</sub> at different flow rate. The sample loop of TCD-GC and FID-GC is 1 mL. The flow rate of the CO<sub>2</sub> gas in the system is 30 mL/min.
